# Supplementary material for: Observational analysis of the daily cycle of the planetary boundary layer in the central amazon during a typical year and under the influence of the ENSO (GoAmazon project 2014/5)
Source: Copernicus journal article supplement (doi:10.5194/acp-2019-578), 2019-07-17
Supplement: Supplementary file [file acp-2019-578-AC1-supplement.pdf]

Table 2 Standard deviation calculated for PBL height measurements of instruments at different intervals of the daily cycle.

| $\sigma$ – IOP1 (February 15 to March 31, 2014)   |            |            |            |            |
|---------------------------------------------------|------------|------------|------------|------------|
| Hours                                             | 00 – 06 LT | 06 – 09 LT | 09 – 18 LT | 18 – 23 LT |
| Ceilometer                                        | 27.2       | 18.0       | 10.7       | 9.7        |
| Lidar                                             | -X-        | 15.5       | 23.4       | -X-        |
| MWR                                               | -X-        | -X-        | -X-        | -X-        |
| RWP                                               | 7.5        | 19.3       | 13.3       | 14.1       |
| Sodar                                             | 2.5        | -X-        | -X-        | 4.0        |
| $\sigma$ – IOP2 (September 1 to October 15, 2014) |            |            |            |            |
| Hours                                             | 00 – 06 LT | 06 – 09 LT | 09 – 18 LT | 18 – 23 LT |
| Ceilometer                                        | 5.2        | 21.5       | 18.4       | 11.4       |
| Lidar                                             | -X-        | 13.5       | 29.1       | -X-        |
| MWR                                               | 3.3        | 11.5       | 25.3       | 16.3       |
| RWP                                               | 6.8        | 20.1       | 23.2       | 8.4        |
| Sodar                                             | 2.6        | -X-        | -X-        | 5.8        |

\* “X” represents where absente measurements occurred

Table 3 Standard deviation calculated for PBL height measurements of instruments at different intervals of the daily cycle.

| $\sigma$ – IOP3 (February 15 to March 31, 2015)   |            |            |            |            |
|---------------------------------------------------|------------|------------|------------|------------|
| Hours                                             | 00 – 06 LT | 06 – 09 LT | 09 – 18 LT | 18 – 23 LT |
| Ceilometer                                        | 18.4       | 14.1       | 10.7       | 14.5       |
| Lidar                                             | -X-        | 11.1       | 24.3       | -X-        |
| MWR                                               | 4.3        | 6.8        | 14.7       | 7.8        |
| RWP                                               | 2.4        | 17.2       | 18.4       | 11.6       |
| Sodar                                             | 2.5        | -X-        | -X-        | 4.0        |
| $\sigma$ – IOP4 (September 1 to October 15, 2015) |            |            |            |            |
| Hours                                             | 00 – 06 LT | 06 – 09 LT | 09 – 18 LT | 18 – 23 LT |
| Ceilometer                                        | 11.4       | 7.75       | 13.6       | 15.0       |
| Lidar                                             | -X-        | -X-        | -X-        | -X-        |
| MWR                                               | 2.5        | 16.4       | 27.7       | 12.6       |
| RWP                                               | 3.1        | 8.9        | 29.6       | 7.8        |
| Sodar                                             | 3.6        | -X-        | -X-        | 6.7        |

\* “X” represents where absente measurements occurred
